# Supplementary material
Source: PubMed Central journal article supplement (PMC2718481)
Supplement: supp_171_12_1384__1.pdf [file supp_171_12_1384__1.pdf]

## **Supplemental Material**

Developmental regulation of p66<sup>Shc</sup> is altered by bronchopulmonary dysplasia in baboons and humans

Matt K. Lee, Gloria S. Pryhuber, Margaret A. Schwarz, Susan M. Smith,  
Zdena Pavlova, Mary E. Sunday

## Figure Legends

### Figure E1

Western analysis demonstrates Shc isoform regulation during baboon lung development and induction of BPD. Lysates from normal and premature baboons were equalized by total protein content and subjected to Shc Western analysis. Lanes marked \* and # are identical samples loaded onto different blots to permit quantitation across different membranes. (A), fetal baboon lungs, (B), GAPDH reprobe of (A). Precipitous decline in GAPDH reactivity after birth is noted. Loading is otherwise equivalent. (C), 125 day baboons maintained on a mildly fibrotic BPD protocol. Animals were exposed to minimal O<sub>2</sub> as clinically indicated. (D), GAPDH reprobe of (C) showing equivalent loading. (E), additional gestational control specimens included in analysis. (F) total protein content of (E) demonstrating equivalent loading,

### Figure E2

Minimal PARP proteolysis was noted at any stage of baboon lung development. Sections were subjected to p66<sup>Shc</sup> and cleaved PARP immunohistochemistry (green and red, respectively). Sections were obtained from baboons at 60 days gestation (A), 90 days gestation (B), 125 days gestation (C), 175 days gestation (D), and 3 days after term delivery at 185 days (E). Minimal cleaved PARP immunoreactivity was identified.

### Figure E3

Minimal PARP proteolysis was noted in the 125 day baboon BPD model. p66<sup>Shc</sup> and cleaved PARP

(green and red, respectively) were immunolocalized in lungs from fetal baboons at 125 days gestation or identical animals maintained for 14 days *ex utero* with supplemental oxygen only as clinically indicated. Minimal cleaved PARP reactivity was noted. Mesenchymal p66<sup>Shc</sup> localization in the 125 day gestational control lung (C) was confirmed co-immunolocalizing p66<sup>Shc</sup> (green) and cytokeratin (red). Epithelial cells are labeled by anti-pan-cytokeratin antibody (Sigma). In contrast, 125 day animals maintained for 14 days *ex utero* demonstrated widespread epithelial localization (D). Co-immunolocalization of p66<sup>Shc</sup> (green) and  $\alpha$ -smooth muscle actin (red) indicated minimal co-localization in either 125 day gestational controls (E) or animals maintained for 14 days *ex utero*. Smooth muscle actin is expressed by myofibroblasts, airway smooth muscle, and vascular smooth muscle. Specificity was confirmed by probing otherwise identically processed sections were with anti-p66<sup>Shc</sup> antibody preadsorbed to the immunizing peptide.

#### **Figure E4**

Regulated tissue localization of p66<sup>Shc</sup> in the 140 day fetal baboon BPD model was confirmed by co-localization with cytokeratin. Epithelial cells are labeled red by anti-pan-cytokeratin antibody while p66<sup>Shc</sup> is labeled green. In 140 day gestational controls, p66<sup>Shc</sup> is expressed in both epithelial and mesenchymal cells (A). Animals exposed to supplemental O<sub>2</sub> for 10 days only as clinically indicated (B) developed minimal fibrosis and p66<sup>Shc</sup> localization similar to that of 140 day gestational controls. In contrast, 140 day animals exposed to 100% O<sub>2</sub> for 10 days expressed p66<sup>Shc</sup> in clusters of mesenchymal cells within fibrotic interalveolar septa (C). The clinical and pathological severity of BPD in this model is attenuated by infusion of the anti-BLP antibody 2A11. Animals treated with 100% O<sub>2</sub> and 2A11 (D) retained epithelial p66<sup>Shc</sup> expression. Similarly, p66<sup>Shc</sup> also localized to the epithelium of normal 160 day baboon lungs (E). Specificity was confirmed by probing otherwise

identically processed sections with anti-p66<sup>Shc</sup> antibody preadsorbed to the immunizing peptide.

### **Figure E5**

Cells expressing p66<sup>Shc</sup> tended not to co-express  $\alpha$ -smooth muscle actin in the 140 day baboon BPD model. p66<sup>Shc</sup> is labeled green and  $\alpha$ -smooth muscle actin is labeled red. (A), 140 day gestational controls; (B), 140 day animals exposed to minimal supplemental O<sub>2</sub>; (C) 140 day animals exposed to 100% O<sub>2</sub> for 10 days; (D) 140 day animals exposed to 100% O<sub>2</sub> for 10 days while infused with 2A11 antibody; (E) 160 day gestational controls. Even when expressed primarily in the mesenchyme, high level p66<sup>Shc</sup> expression rarely coincided with  $\alpha$ -smooth muscle actin localization. Preadsorbed controls are the same as in Figure E3.

### **Figure E6**

Western analysis demonstrates developmental p66<sup>Shc</sup> regulation in fetal human lungs. (A), Western blot from which Figure 7 was excerpted. All lanes are loaded with 30  $\mu$ g total protein. Quantitation was performed directly without normalization. (B), reprobe of the same blot with anti-glyceraldehyde phosphate dehydrogenase (GAPDH) antibody. A sharp decrease in GAPDH expression after 20 weeks was evident. (C), colloidal gold staining of the same blot demonstrated equivalent overall protein content in each lane.

### **Figure E7**

Tissue localization of p66<sup>Shc</sup> is modulated during human lung development, as confirmed by cytokeratin co-immunolocalization. Lung sections from normal human fetuses were immunostained for p66<sup>Shc</sup> (green) and cytokeratin (red). Epithelial populations were labeled by anti-pan-cytokeratin

antibody. Expression of p66<sup>Shc</sup> was widespread throughout the 18 week lung, and especially prominent in the epithelium (A). At 20 weeks (B), epithelial expression remained strong while mesenchymal expression had diminished. At 22 weeks (C), p66<sup>Shc</sup> had decreased further and high-level expression was restricted to occasional cells in both the epithelial and mesenchymal compartments. By 24 weeks (D), much of the mesenchyme had involuted and relatively few epithelial cells continued to express high levels of p66<sup>Shc</sup>. Specificity was confirmed by probing otherwise identically processed sections with anti-p66<sup>Shc</sup> antibody preadsorbed to the immunizing peptide.

### Figure E8

Contractile cells in the developing human lung do not appear to express p66<sup>Shc</sup>. p66<sup>Shc</sup> is labeled green and  $\alpha$ -smooth muscle actin is labeled red. Myofibroblasts, airway smooth muscle, and perivascular smooth muscle cells contain  $\alpha$ -smooth muscle actin. (A), 18 week human lung; (B), 20 week lung; (C) 22 week lung; and (D) 24 week lung. High level p66<sup>Shc</sup> expression rarely coincides with  $\alpha$ -smooth muscle actin localization. Preadsorbed controls are the same as in Figure E6.

### Figure E9

Apoptosis is not clearly related to p66<sup>Shc</sup> expression in developing human lung. Cleaved PARP expression is an early marker of apoptosis. Lung sections were co-immunostained for p66<sup>Shc</sup> (green) and cleaved PARP (red). In the 18 week lung (A), occasional areas of cleaved PARP were noted in the mesenchyme, but no clear association with p66<sup>Shc</sup> expression could be discerned. In the 20 week lung (B), PARP cleavage had diminished while p66<sup>Shc</sup> remained relatively abundant. Subsequently, PARP proteolysis was undetectable in the 22 week (C) and 24 week (D) human lung. Specificity was confirmed by probing otherwise identically processed sections with p66<sup>Shc</sup> antibody preadsorbed to the

immunizing peptide.

### **Figure E10**

The tissue localization of p66<sup>Shc</sup> is modulated by induction of BPD in human neonates. Pathological sections were immunostained for p66<sup>Shc</sup> (green) and cytokeratin (red). Autopsies were performed within 6 hours of death, and clinical synopses are listed in Table 1. In near-term newborn infants without lung disease, (A, Case 2, 4 day old ex-36 week infant), nearly all cells expressed some p66<sup>Shc</sup>. However, more intensely labeled cells were scattered throughout the mesenchyme. Newborn preterm infants had thicker septa (B, Case 9, 1 day old ex-27 week infant) than term newborns. Moderate levels of p66<sup>Shc</sup> were present in most mesenchymal cells, and high-level expression was apparent in scattered epithelial cells. Older premature infants without BPD (C, Case 10, 32 day old ex-28 week infant) had thinner interalveolar septa, but continued to exhibit moderate p66<sup>Shc</sup> labeling of most mesenchymal cells and increased expression within scattered epithelial cells. In contrast, the lungs of a 13 day old ex-28 week infant with early evolving BPD (D, Case 7) had thickened septa, heterogeneously labeled mesenchymal cells, and continuous lines of labeled epithelial cells. In an older patient with mildly fibrotic BPD (E, Case 5, 60 day old-ex 26 week infant), p66<sup>Shc</sup> localized to continuous lines of strongly expressing epithelial cells. As in early BPD, the mesenchymal compartment was heterogeneously labeled. In contrast, the patient with severe fibrotic BPD (F, Case 4, 97 day old ex-27 week infant) expressed p66<sup>Shc</sup> primarily in the mesenchyme, with relatively little epithelial expression.

### **Figure E11**

p66<sup>Shc</sup> is not strongly expressed by contractile cells in lungs with BPD. Pathological sections were

immunostained for p66<sup>Shc</sup> (green) and  $\alpha$ -smooth muscle actin (red). Smooth muscle actin is expressed by myofibroblasts, airway smooth muscle, and vascular smooth muscle (A), Case 2, 4 day old ex-36 week infant without lung disease; (B), Case 9, 1 day old ex-27 week infant; (C), Case 10, 32 day old ex-28 week infant without BPD; (D), 13 day old ex-28 week premature infant with early evolving BPD; (E), Case 5, 60 day old-ex 26 week infant), an older patient with mildly fibrotic BPD; and (F), Case 4, 97 day old ex-27 week infant, a patient with a clinical course consistent with classical severe fibrotic BPD. Cells expressing p66<sup>Shc</sup> tended not to express  $\alpha$ -smooth muscle actin.

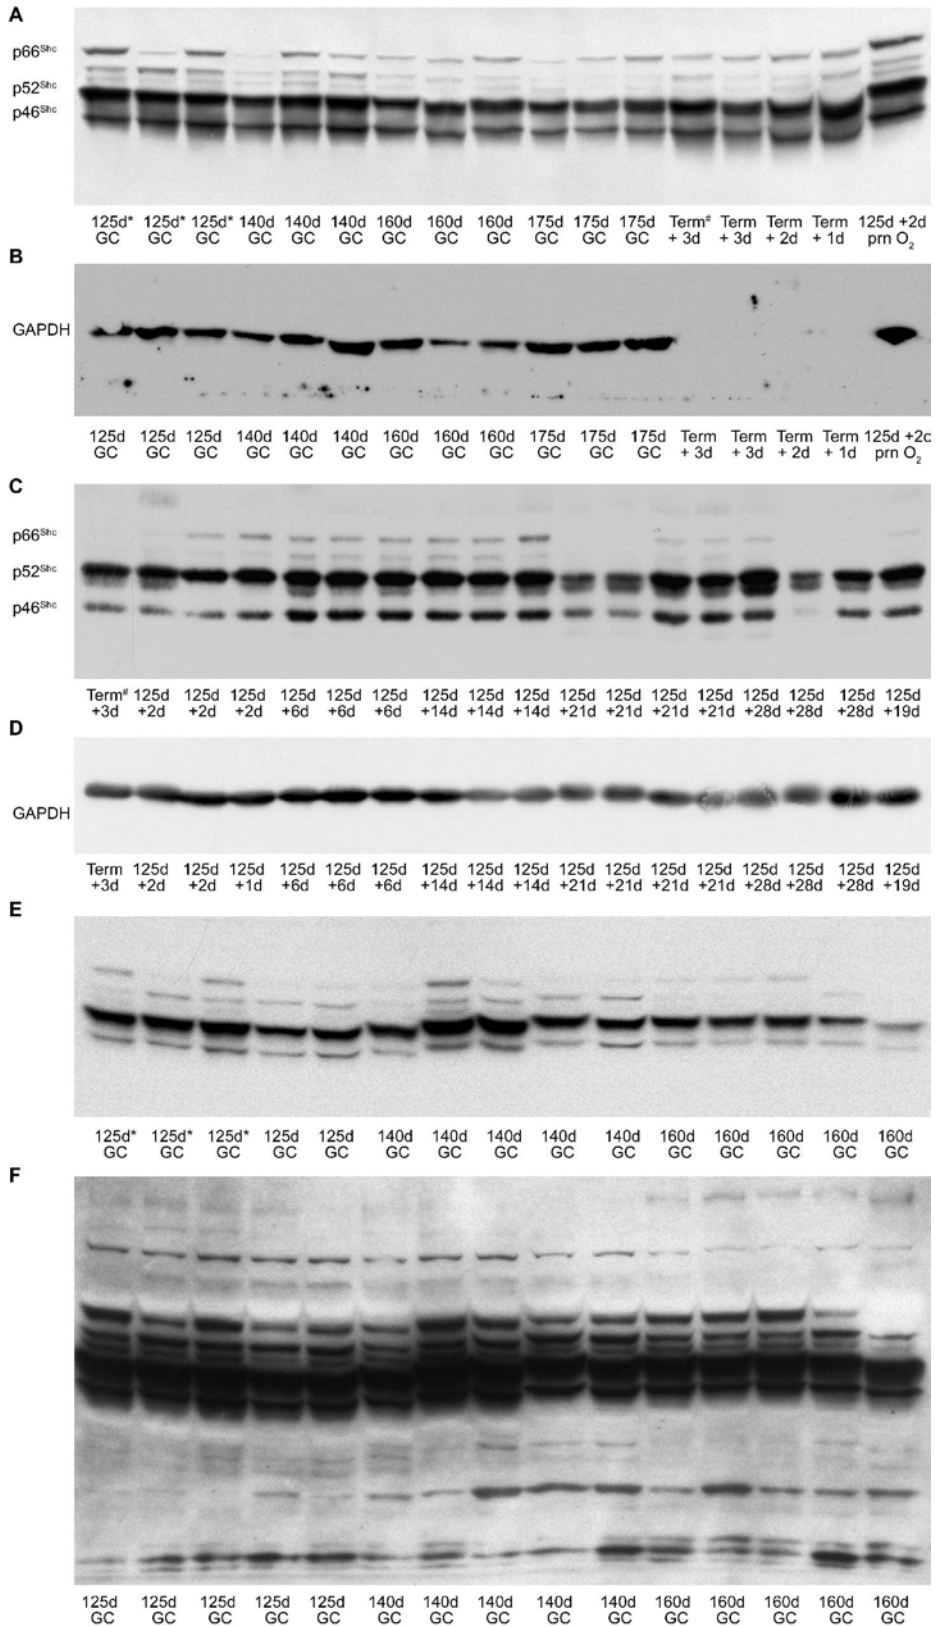

Figure E1



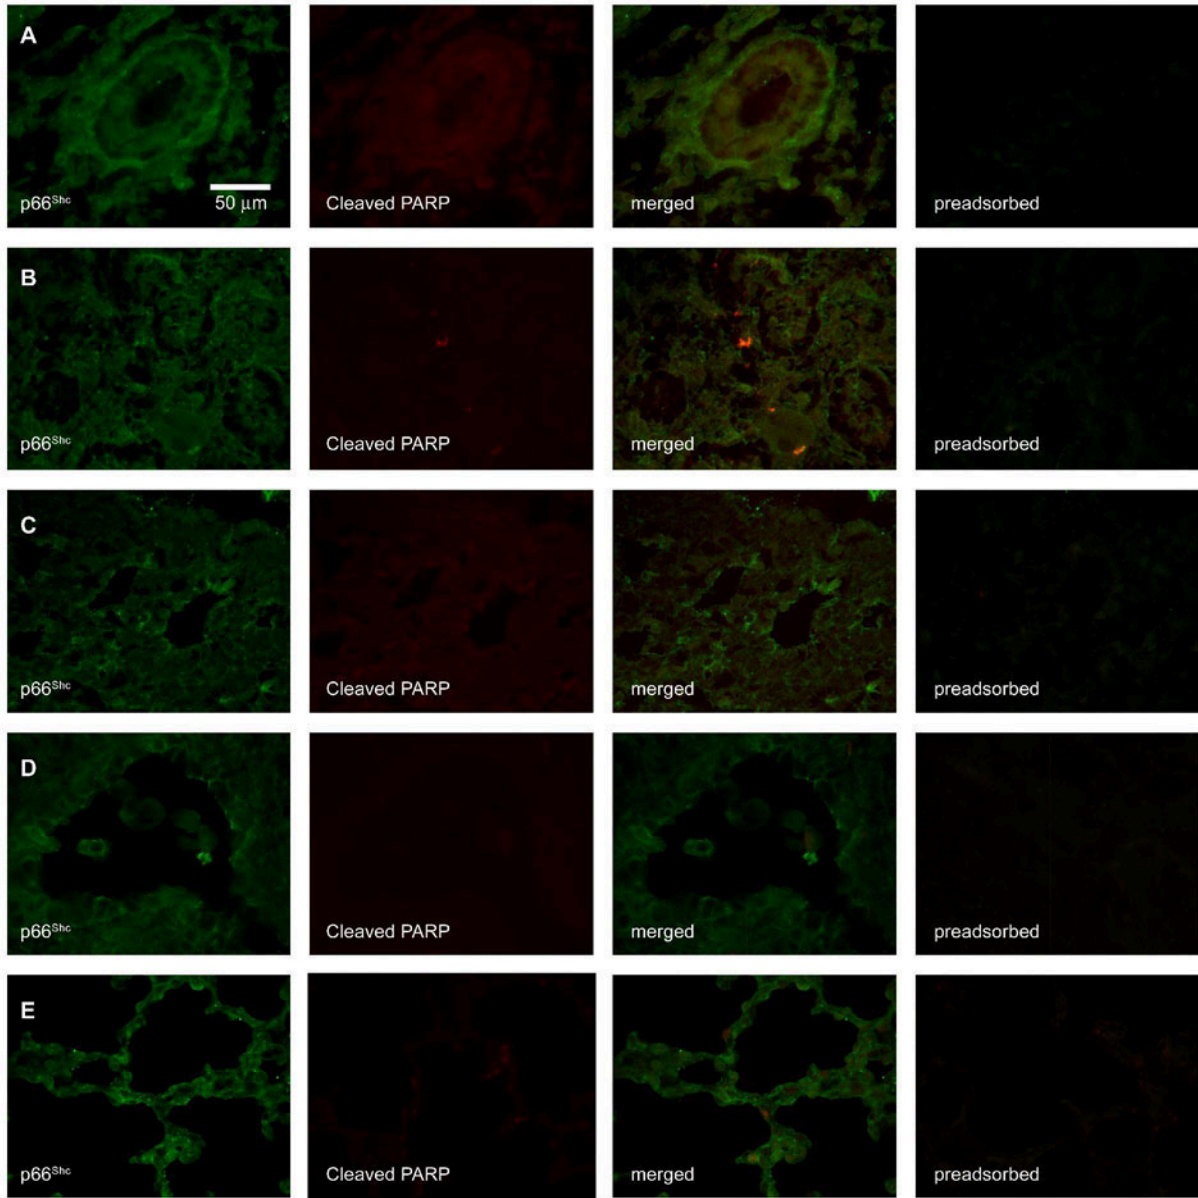

Figure E2

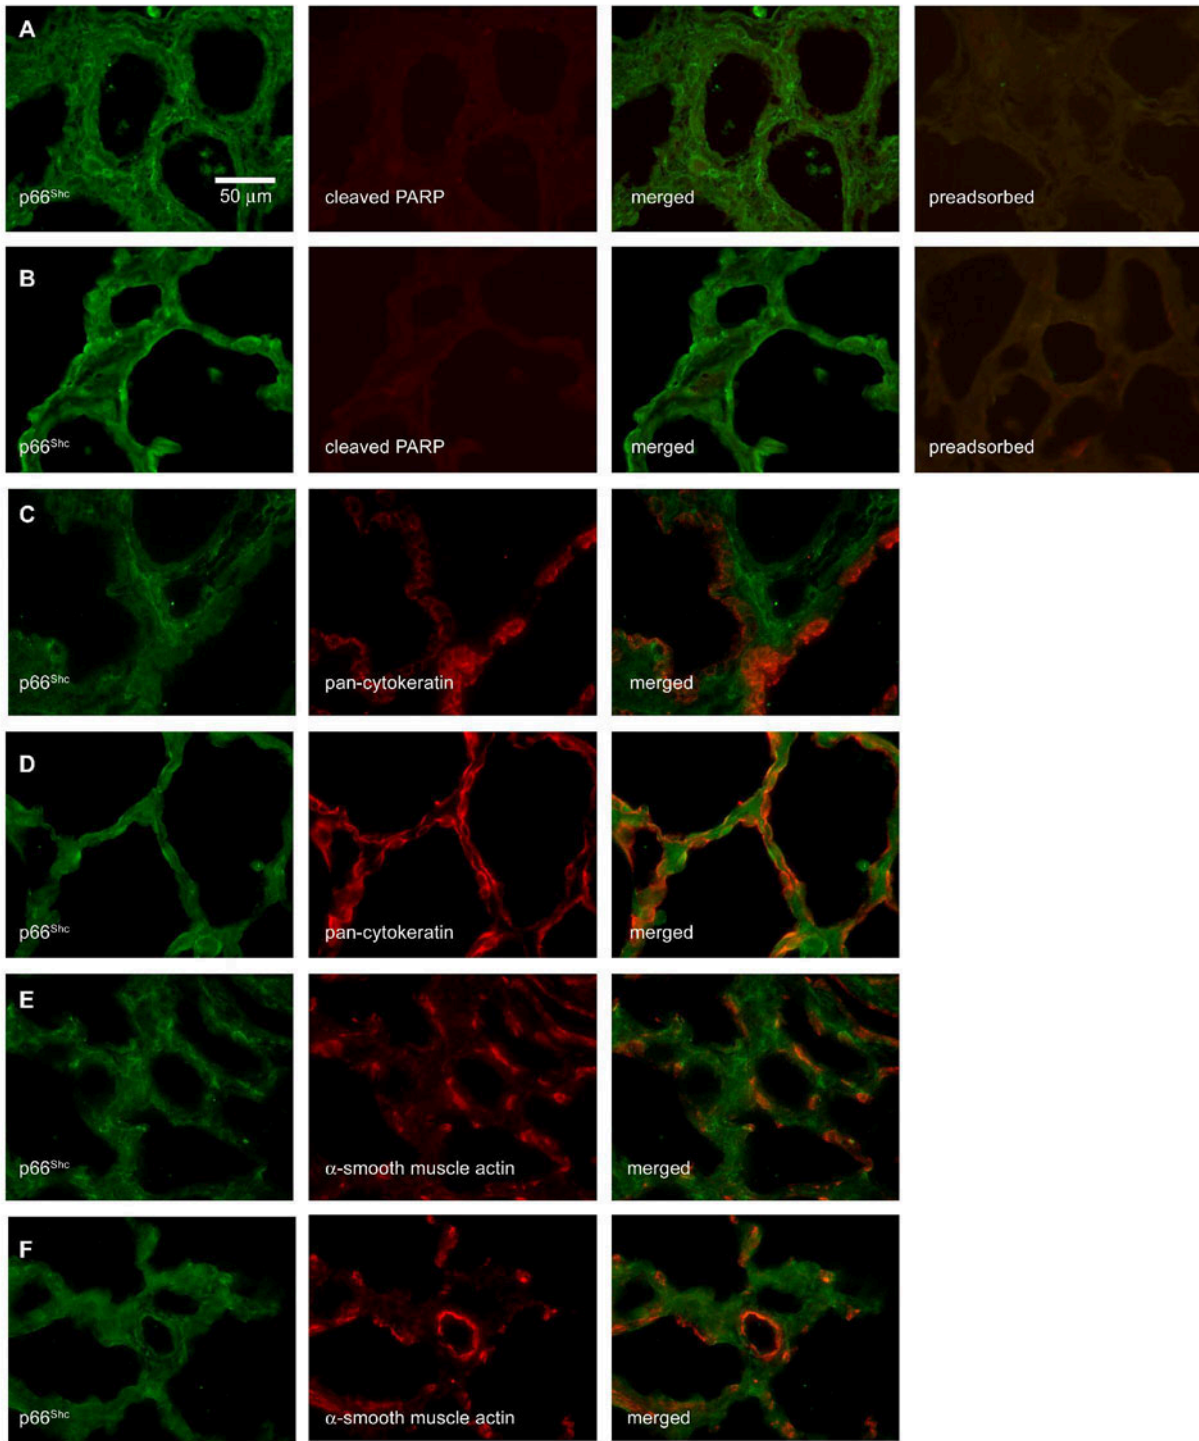

Figure E3

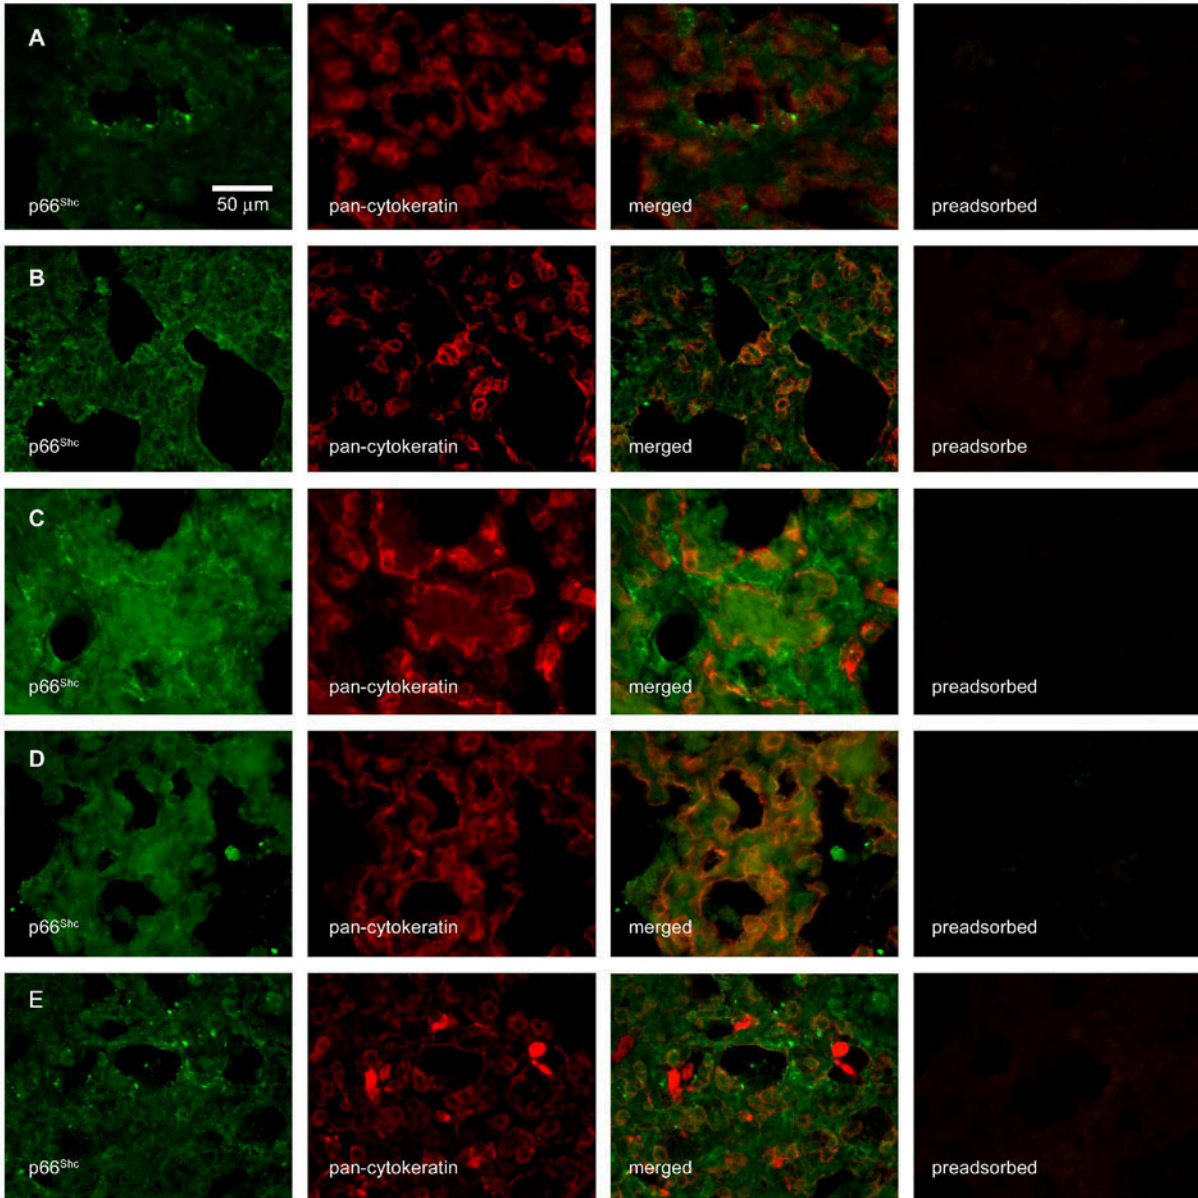

Figure E4

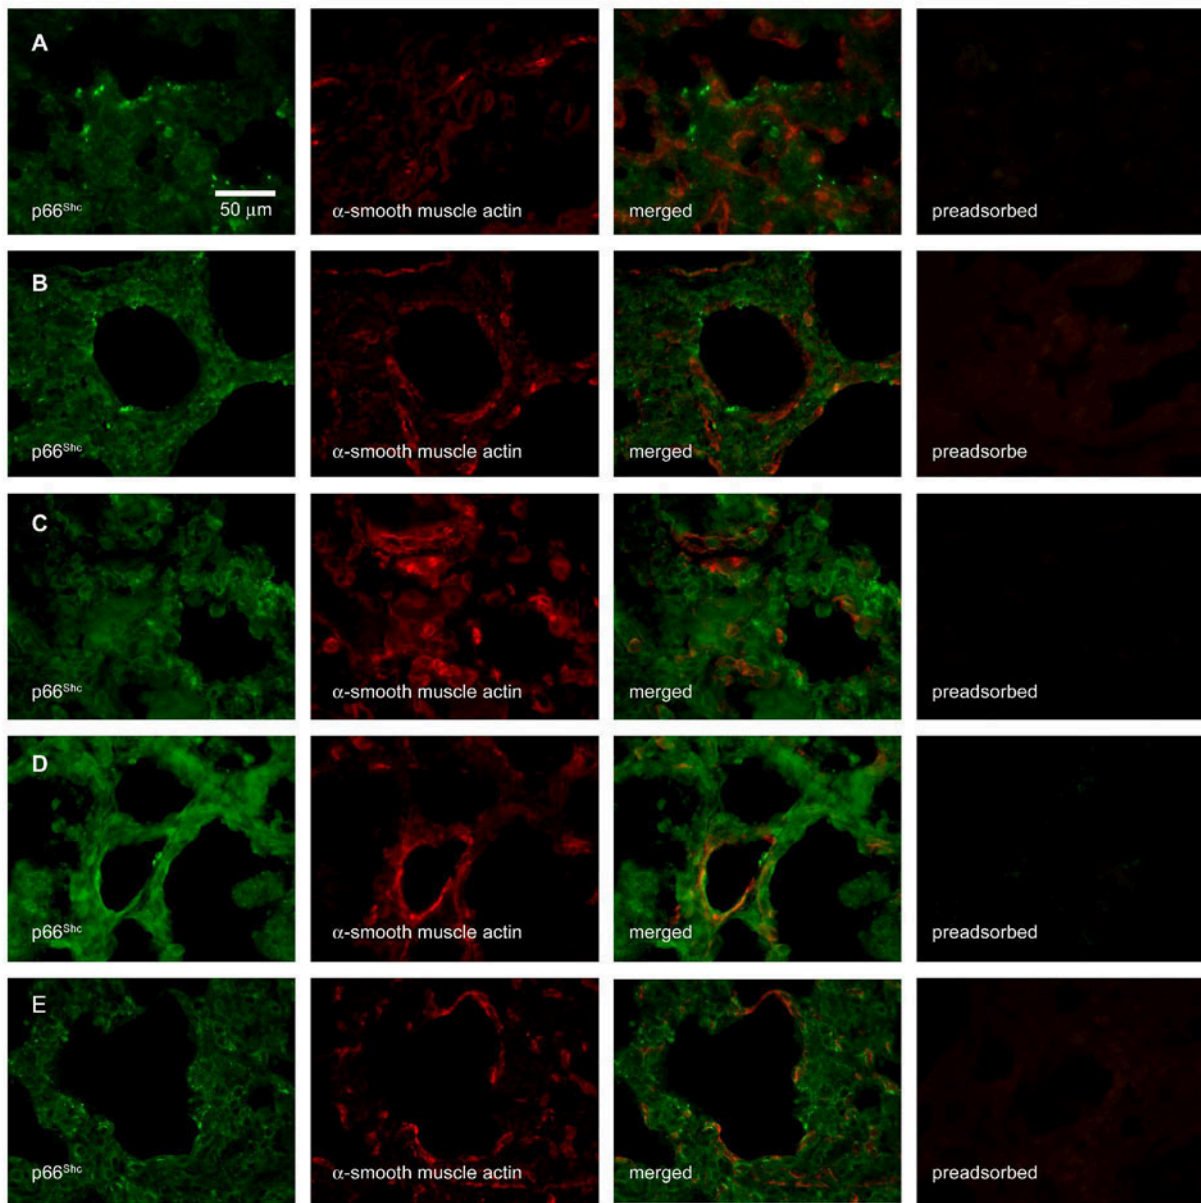

Figure E5

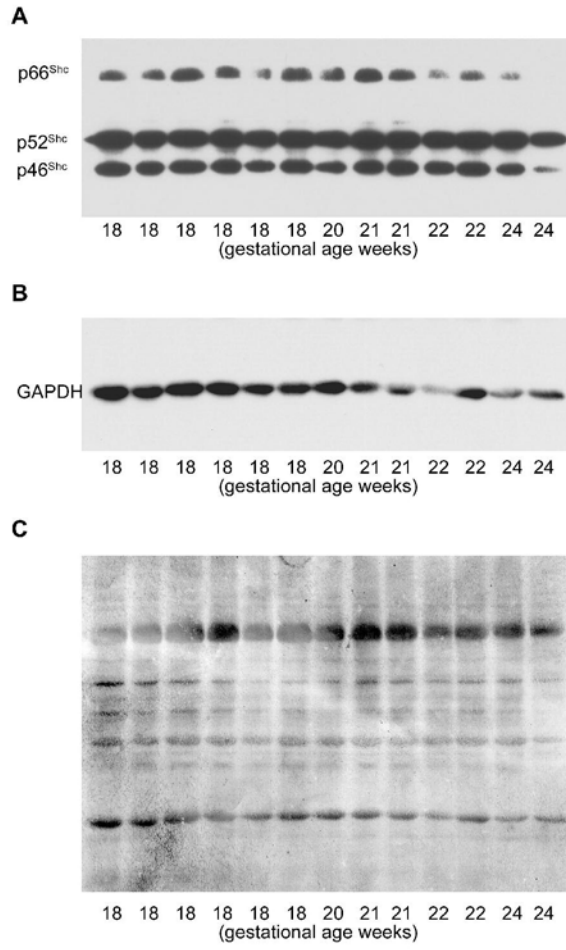

Figure E6

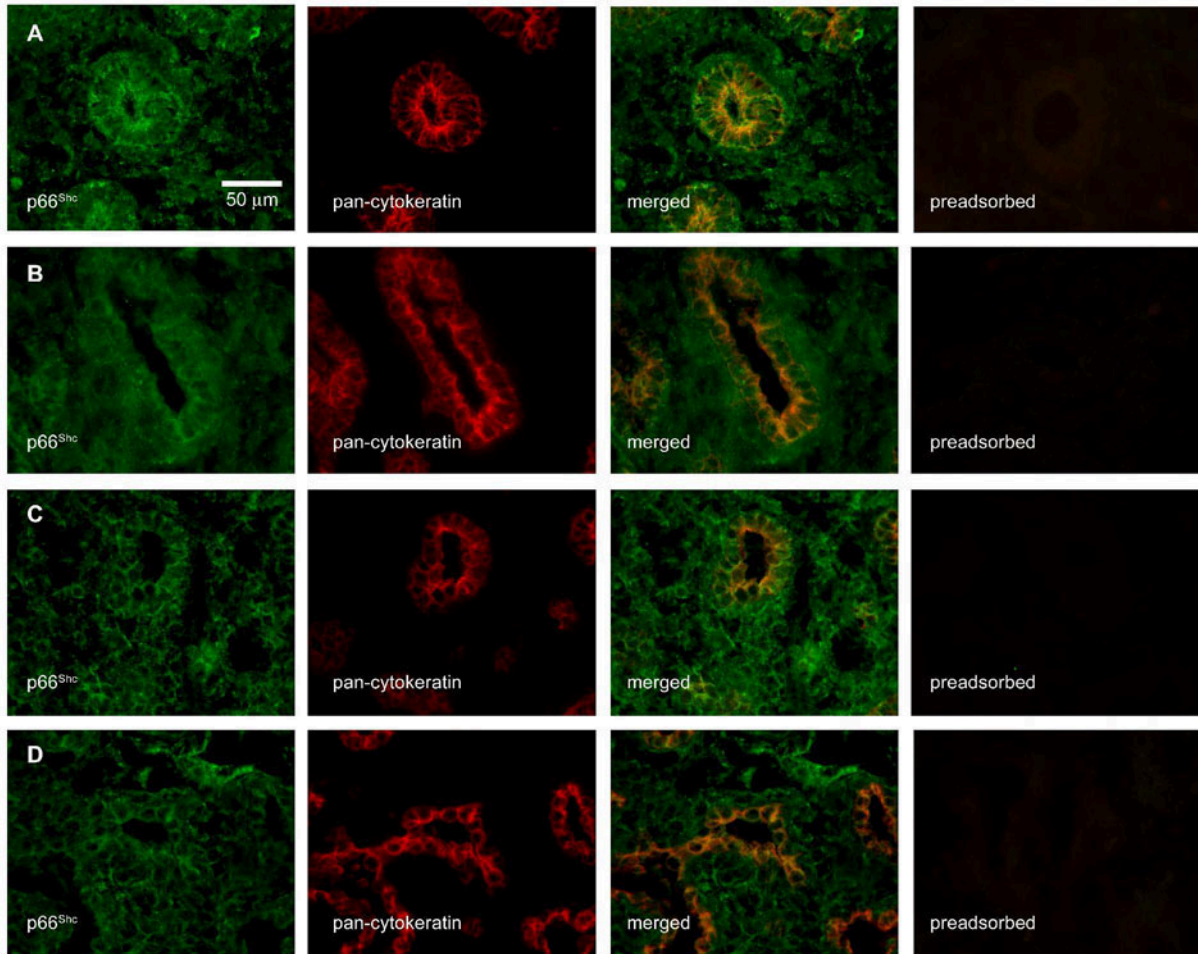

Figure E7

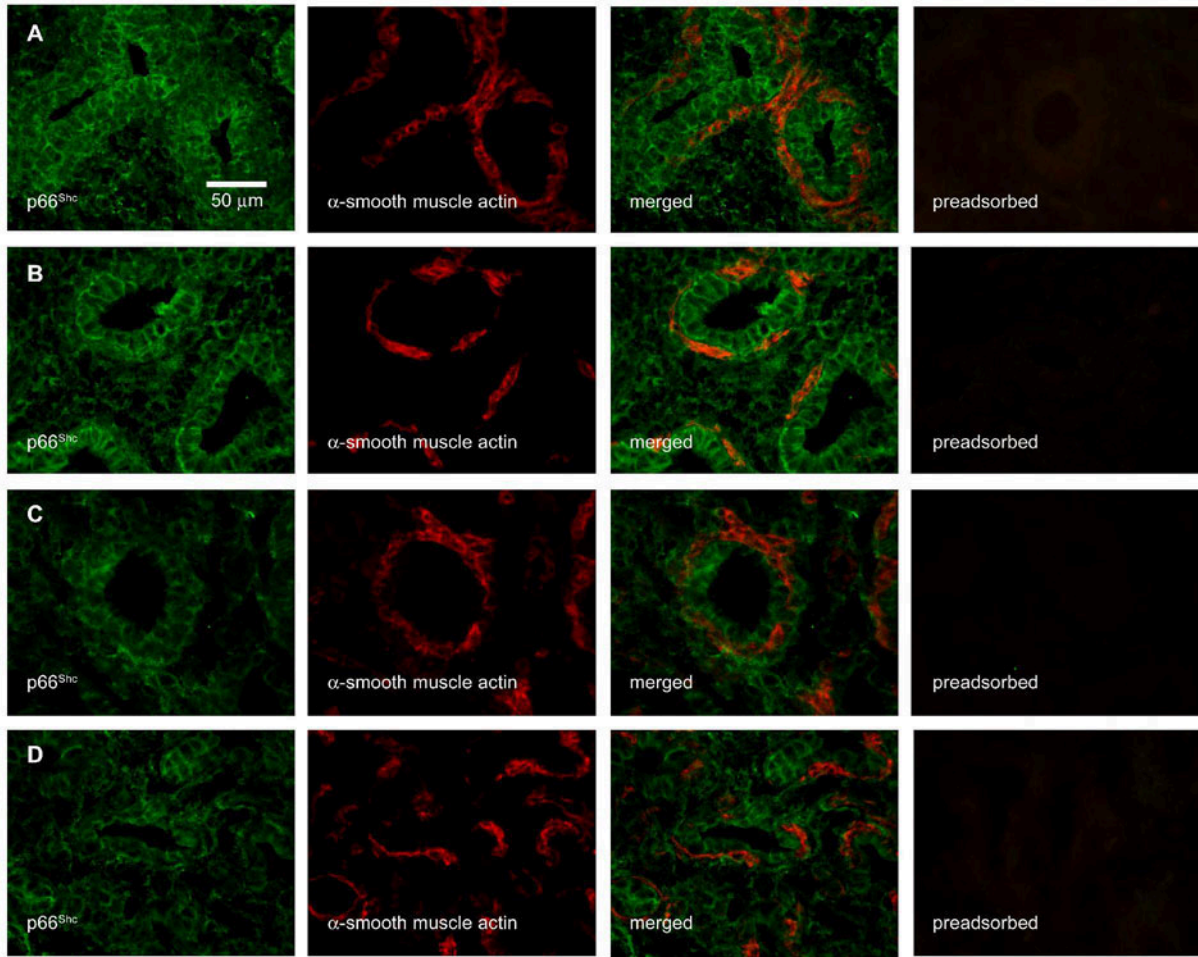

Figure E8

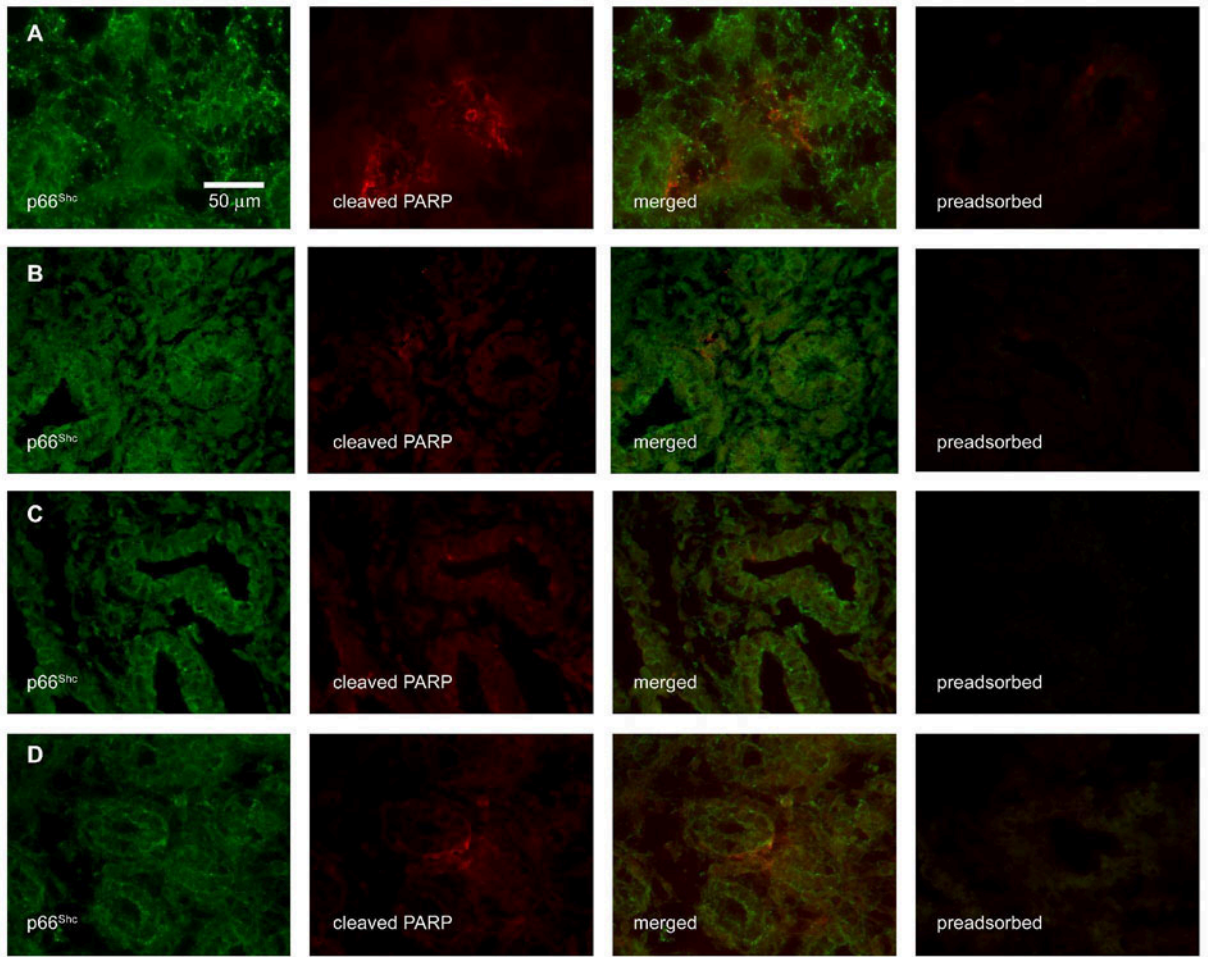

**Figure E9**



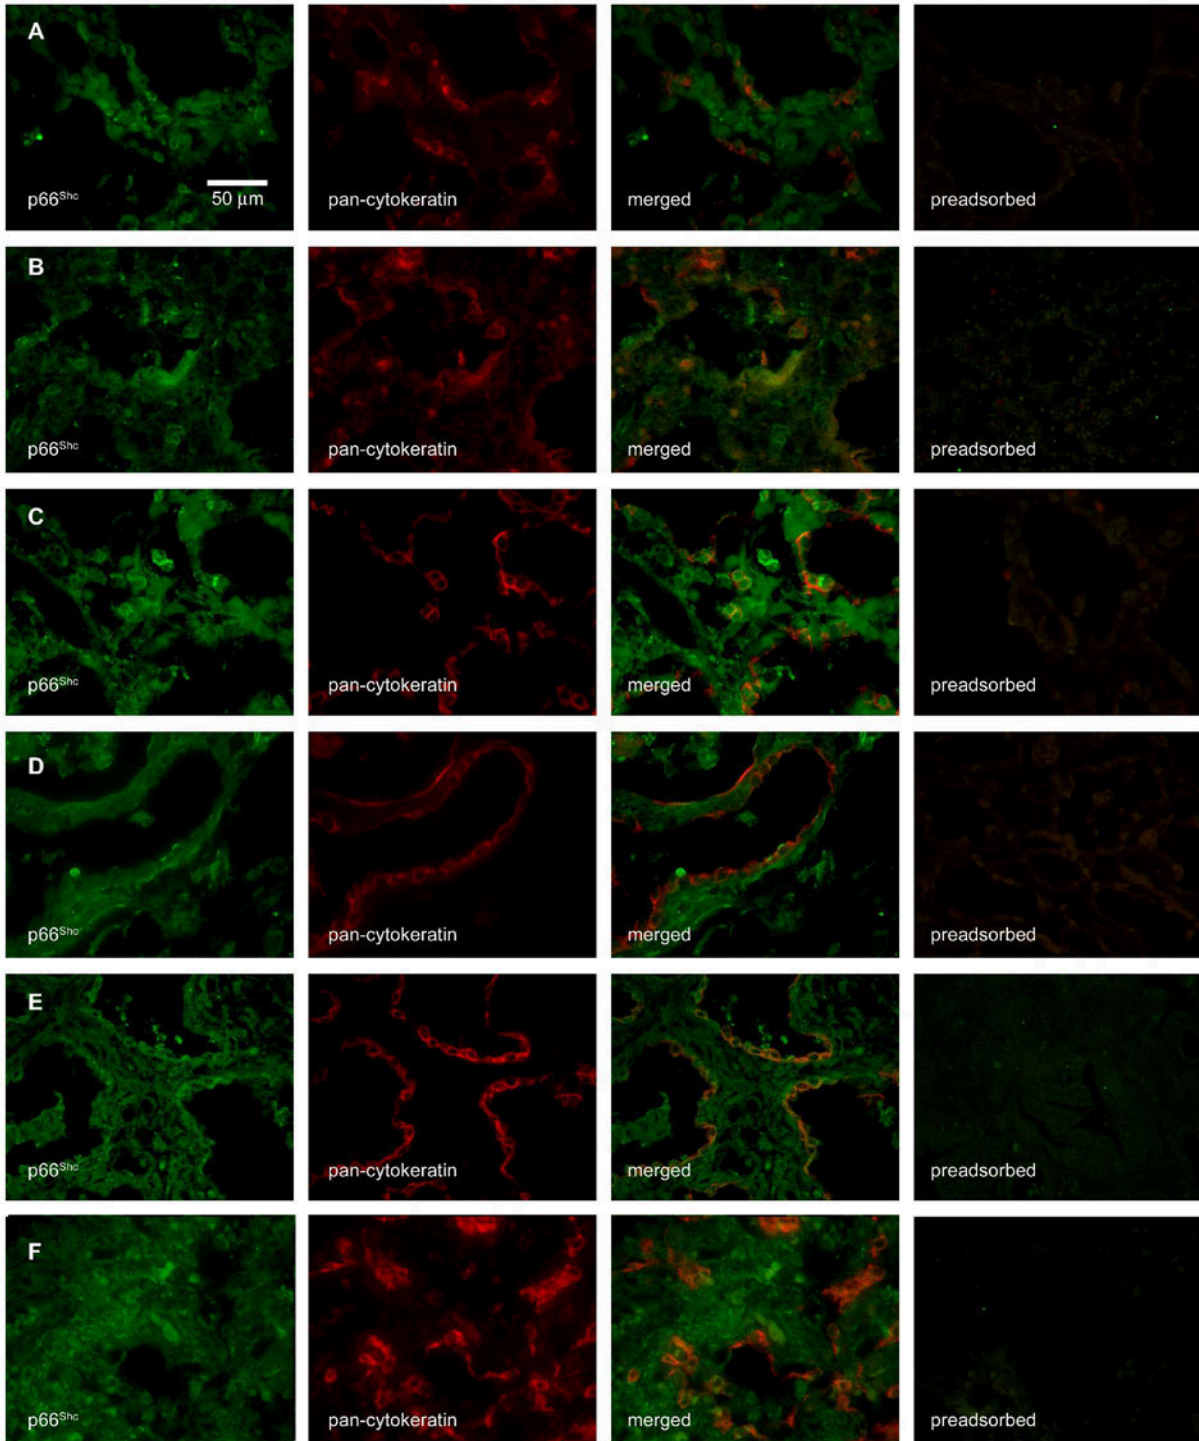

Figure E10

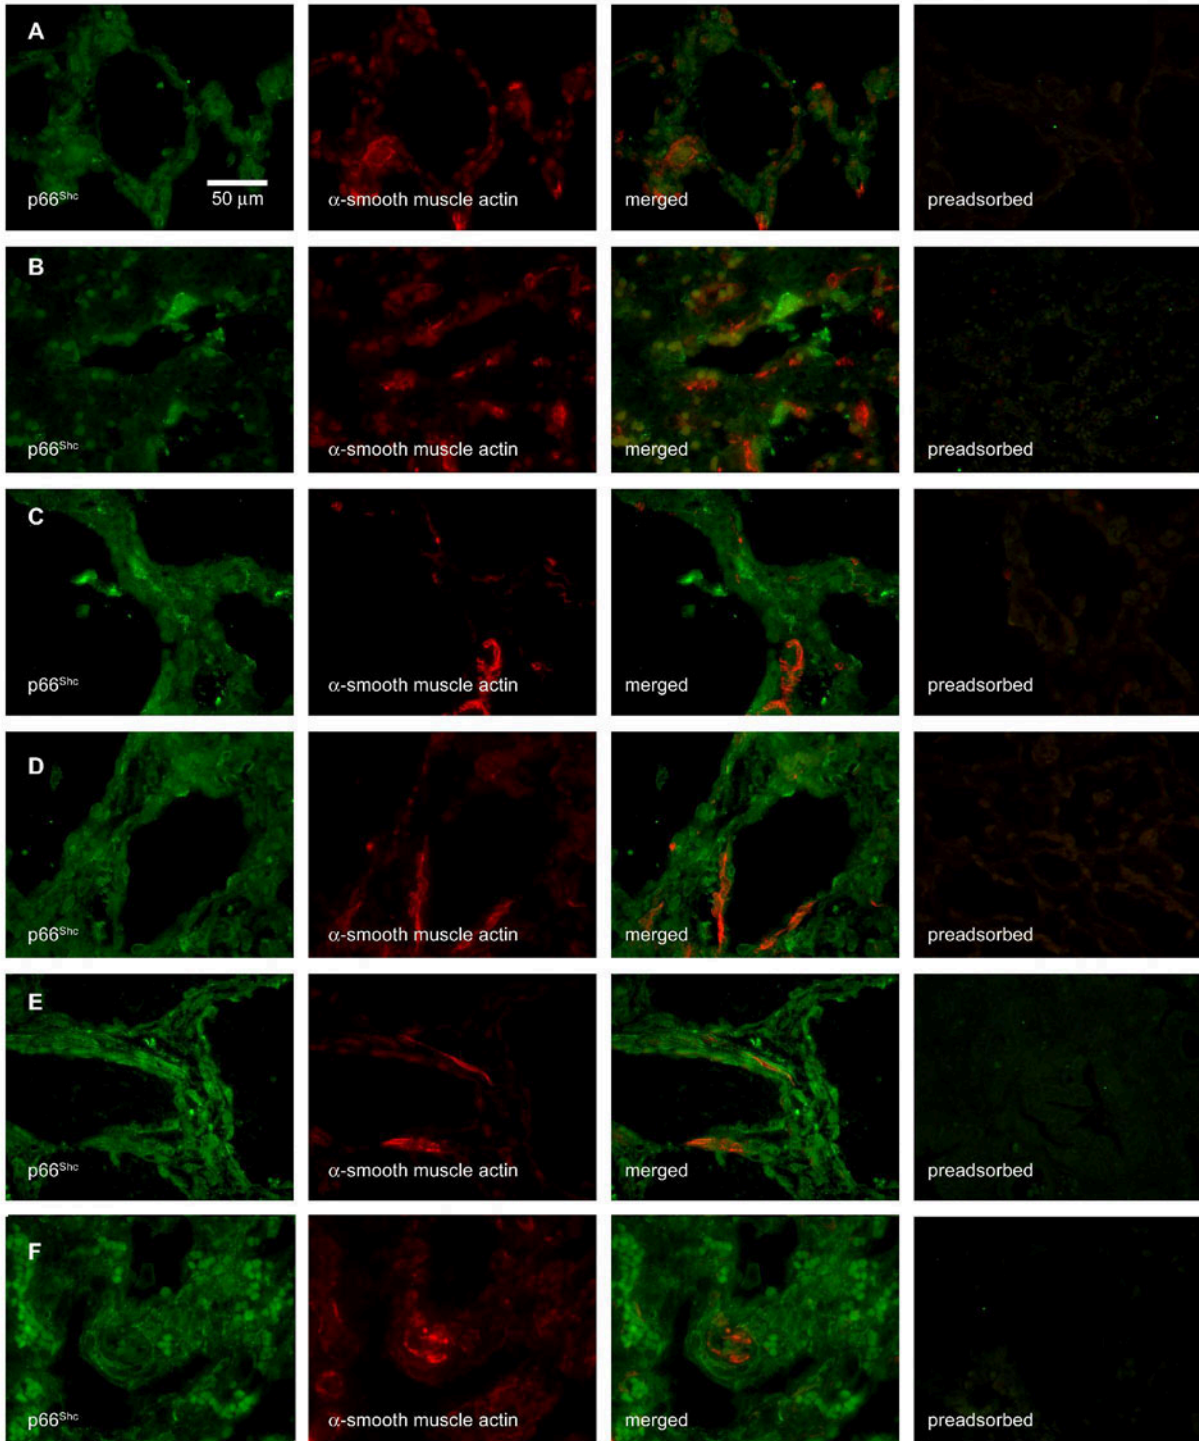

Figure E11
